# Supplementary material
Source: ML conference proceedings conference paper supplement (https://openreview.net/forum?id=mcx8IGneYw)
Supplement: supplementary_material [file attachment]

## Motivation: Lighting Camera Simulation

- Varying lighting conditions** may harm robot perception performance
- Camera simulation** can scalably generate *diverse*, *controllable*, and *realistic* images under different lighting conditions
- Perception performance is improved** by training on generated data

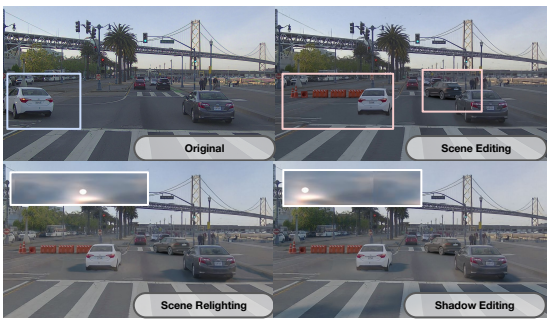

## Building Lighting-Aware Digital Twins

- Building digital twins from the real world:**
  - diverse:** twins are reconstructed from large real-world dataset
  - controllable:** PBR allows dynamic actor placement, modification of SDV location, and simulation of novel lighting conditions
  - realistic:** neural deferred rendering enhances PBR
- Existing methods:**
  - bake lighting into scene; cannot simulate new lighting conditions
  - have difficulty performing well on large outdoor scenes
  - are restricted to static scenes

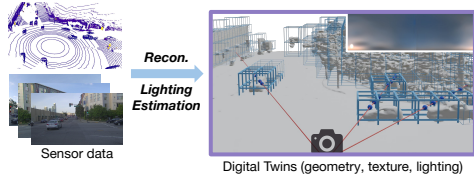

## LightSim

- LightSim:** (a) allows simulation of novel lighting conditions (b) reconstructs large, dynamic outdoor scenes (c) enables lighting-aware scene editing & actor insertion
- Lighting Estimation**
  - Leverage multi-camera data to build panorama
  - Fill gaps in panorama with image inpainting to create LDR panorama
  - Lift LDR pano to HDR sky dome with estimator network

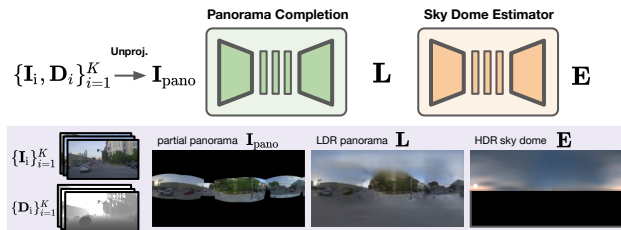

- Neural Deferred Rendering**
  - PBR images capture lighting effects well but lack realism
  - Use neural rendering network with lighting-relevant PBR buffers for enhanced realism
  - Train on combo of synthetic & real-world data to ensure controllable lighting & realism

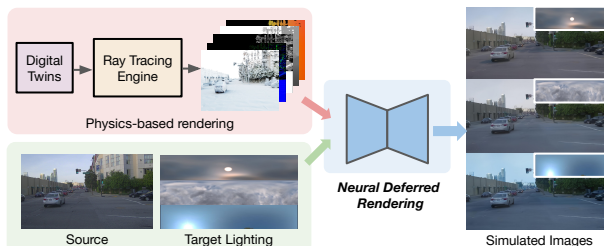

Enhance realism through edge-based content-preserving loss

$$\mathcal{L}_{\text{relight}} = \frac{1}{N} \sum_{i=1}^N \left( \underbrace{\left\| \mathbf{I}_i^{\text{tgt}} - \hat{\mathbf{I}}_i^{\text{tgt}} \right\|_2}_{\mathcal{L}_{\text{color}}} + \underbrace{\lambda_{\text{lpips}} \sum_{j=1}^M \left\| V^j(\mathbf{I}_i^{\text{tgt}}) - V^j(\hat{\mathbf{I}}_i^{\text{tgt}}) \right\|_2}_{\mathcal{L}_{\text{lpips}}} + \underbrace{\lambda_{\text{edge}} \left\| \nabla \mathbf{I}_i^{\text{tgt}} - \nabla \hat{\mathbf{I}}_i^{\text{tgt}} \right\|_2}_{\mathcal{L}_{\text{reg}}} \right)$$

## Results

- Qualitative comparison with SOTA approaches:**

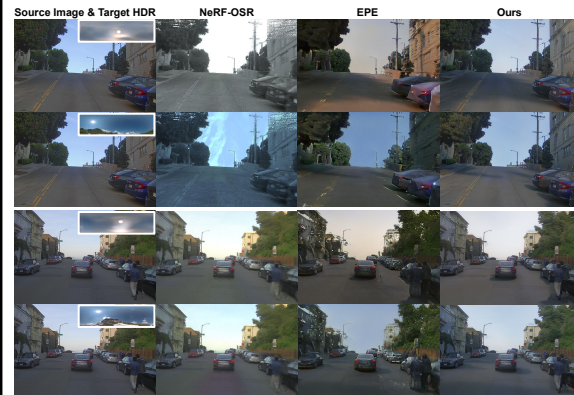

- Quantitative comparison with SOTA approaches:**

| Method                         | FID ↓       | KID ( $\times 10^3$ ) ↓ | Model             | mAP (%)            |
|--------------------------------|-------------|-------------------------|-------------------|--------------------|
| NeRF-OSR [Rudnev et al., 2022] | 143.9       | 94.0 ± 7.5              | Real              | 32.1               |
| EPE [Richter et al., 2021]     | 93.0        | 56.0 ± 5.0              | Real + Sim (EPE)  | 32.5 (+0.4)        |
| LightSim (Ours)                | <b>87.1</b> | <b>30.4 ± 4.0</b>       | Real + Sim (Ours) | <b>36.6 (+4.5)</b> |

- Generalization to nuScenes dataset:**

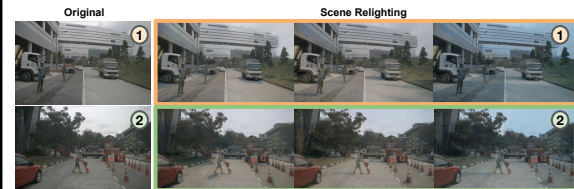

- Limitations:** (a) no support for local light sources (b) difficulty removing strong shadows in sunny scenes (c) fixed materials may cause real-sim domain gap
